1 Title: FCGR2A-131H/H is under-represented amongst patients with  
2 primary immunodeficiencies

3

4 **Short running title (50 Chars): Role of FCGR variants in patients with PID**

5

6 Edward W D Flewitt<sup>1</sup>, James E G Charlesworth<sup>2,3</sup>, Smita Y Patel<sup>1,3</sup>, Chantal E Hargreaves<sup>1</sup>

7

8 <sup>1</sup>Nuffield Department of Medicine and Oxford NIHR Biomedical Research Centre, University of  
9 Oxford, Oxford, OX3 9DU, UK.

10 <sup>2</sup>Department of Paediatrics, John Radcliffe Hospital, Oxford University Hospitals NHS Foundation  
11 Trust, Oxford, OX3 9DU

12 <sup>3</sup>Clinical Immunology Department, John Radcliffe Hospital, Oxford University Hospitals NHS  
13 Foundation Trust, Oxford, OX3 9DU

14 Corresponding author: Smita Y Patel, email: [smita.patel@ndm.ox.ac.uk](mailto:smita.patel@ndm.ox.ac.uk)

15

16 Abbreviations: CMC (chronic mucocutaneous candidiasis), CVID (common variable  
17 immunodeficiency disorder), F (phenylalanine), FCGR (Fc gamma receptor), H (histidine), HWE  
18 (Hardy-Weinberg equilibrium), I (isoleucine), ITP (immune thrombocytopenia purpura), PCR  
19 (polymerase chain reaction), PID (primary immunodeficiencies), R (arginine), SLE (systemic lupus  
20 erythematosus), SNP (single nucleotide polymorphism), T (threonine), V (valine)

21

22 Word count: 2978

23 Title heading: Human Immunology

## 24 Abstract

25 The Fc $\gamma$  receptors (Fc $\gamma$ Rs) act as modulators of the immune system and have previously been shown  
26 to play a role in immune disorders such as systemic lupus erythematosus and immune  
27 thrombocytopenic purpura. Thus far, their role in primary immunodeficiencies (PID), including  
28 common variable immunodeficiency disorders (CVID), has not been studied. In this paper we  
29 explored whether there is an association between the following single nucleotide polymorphisms  
30 (SNPs) and CVID: *FCGR2A* H131R (rs1801274), *FCGR2B* I232T (rs1050501), and *FCGR3A* F158V  
31 (rs396991). We compared the genotypes of a cohort of 83 patients with PID, including 56 with CVID,  
32 against controls. We found a significant difference between our mixed PID cohort and controls at the  
33 *FCGR2A* H131R SNP ( $X^2 = 7.884$ ,  $p = 0.019$ ). There was not a significant difference at either of the  
34 other SNPs studied. Further, we examined the effect of FCGR SNPs on the incidence of the most  
35 common CVID complications within our cohort: anaemias, organ-specific autoimmunity,  
36 bronchiectasis, splenomegaly, granulomata, and cytopenias. We found no significant association  
37 between SNPs and the development of these complications. In summary, we have shown that there is  
38 a link between the *FCGR2A* H131R SNP and the development of a PID.

39

40 Keywords: primary immune deficiency; PID; common variable immunodeficiency disorders; CVID;  
41 cytopenia; Fc gamma receptors

- 42 Funding information: SYP is funded by the Oxford NIHR Biomedical Research Centre, EWDF was
- 43 funded by the University of Oxford's Final Honours School.
- 44 Conflict of interest statement: The authors have no conflicts of interest to disclose.

## 45 Introduction

46 Fc $\gamma$  receptors (Fc $\gamma$ Rs) are glycoproteins, encoded on chromosome 1q23-24, which bind the Fc portion  
47 of IgG[1, 2]. There are six human Fc $\gamma$ Rs found on various immune cells which, when ligated,  
48 modulate the immune response[2]. Fc $\gamma$ Rs vary in structure and function, and are classified according  
49 to their affinity for IgG immune complexes. The high-affinity Fc $\gamma$ RI (CD64) binding monomeric IgG,  
50 and the low-affinity receptors, Fc $\gamma$ RIIa (CD32a), Fc $\gamma$ RIIb (CD32b), Fc $\gamma$ RIIc (CD32c), Fc $\gamma$ RIIIa  
51 (CD16a) and Fc $\gamma$ RIIIb (CD16b)[2-5]. Engagement of the Fc $\gamma$ Rs results in cellular activation, with the  
52 exception of Fc $\gamma$ RIIb, which is the sole inhibitory receptor. Immune cell activation is balanced by the  
53 relative engagement of the activating and inhibiting low affinity Fc $\gamma$ Rs, with immune dysregulation  
54 and autoimmune diseases such as systemic lupus erythematosus (SLE) and rheumatoid arthritis  
55 resulting from disrupting this balance[1].

56

57 There are three single nucleotide polymorphisms (SNPs) within the low-affinity receptors widely  
58 reported to affect receptor function upon IgG binding[1]. These are located in the genes *FCGR2A*,  
59 *FCGR2B*, and *FCGR3A* which encode Fc $\gamma$ RIIa, Fc $\gamma$ RIIb, and Fc $\gamma$ RIIIa, respectively[6-8]. In  
60 *FCGR2A*, a histidine (H) to arginine (R) SNP (rs1801274) at amino acid 131  
61 (NM\_001136219.3(FCGR2A):c.500A>G (p.His131Arg)), in which the H variant confers higher  
62 affinity for IgG than the R variant, particularly IgG2[9]. An isoleucine (I) to threonine (T) SNP  
63 (rs1050501) is located at amino acid 232 in *FCGR2B* (NM\_004001.4(FCGR2B):c.695T>C  
64 (p.Ile232Thr)), with the T variant inhibiting the receptor associating with lipid rafts in the cell  
65 membrane, reducing inhibition of B cell receptor signalling[10, 11]. Additionally, polymorphisms  
66 within the promoter region of *FCGR2B* have been linked to altered receptor expression and  
67 autoimmunity[12]. In *FCGR3A*, a phenylalanine (F) to valine (V) SNP (rs39699) at amino acid 158  
68 (NM\_001127593.1(FCGR3A):c.526T>G (p.Phe158Val)), increases the receptor's affinity for IgG[6].  
69 Copy number variants affecting this locus have also been described and reported to affect disease  
70 susceptibility[10, 13-16].

71

72 These SNPs are associated with an increased risk of developing autoimmune diseases. The high  
73 affinity *FCGR2A* 131H variant is associated with childhood-onset immune thrombocytopenic purpura  
74 (ITP), rheumatoid arthritis, and Kawasaki disease[17-19]. Similarly, the high affinity *FCGR3A* 158V  
75 variant is associated with both childhood- and adult-onset ITP[18, 20]. No clear pathological  
76 mechanism has been established, however variants which confer higher affinity for ligand may lead to  
77 greater immune cell activation, and thus autoimmunity. The inhibitory FcγRIIb receptor low affinity  
78 *FCGR2B* 232T variant has been associated with ITP and SLE[21-23]. In SLE the decreased inhibitory  
79 activity alters the germinal centre's control of peripheral tolerance which is proposed to lead to the  
80 hyper-activation of the PI3K pathway, leading to the hyper-reactive features[24, 25].

81

82 Primary immunodeficiencies (PIDs) are a heterogeneous group of rare disorders characterised by poor  
83 or absent function of at least one immune system component. Common variable immunodeficiency  
84 disorders (CVID), a subtype of PID, is characterised by a marked decrease in IgG and at least one of  
85 IgM or IgA, poor antibody response to vaccination, and an onset after 2 years of age, in the absence of  
86 other causes of immunodeficiency[26, 27]. CVID has an estimated prevalence of 1 in 25,000 and is  
87 the most common symptomatic antibody deficiency disorder[28, 29]. The aetiology of CVID is not  
88 fully understood[30]. A genome-wide association study, and our whole genome sequencing study, of  
89 patients with CVID both concluded that CVID is a polygenic disease[31, 32]. Patients with CVID can  
90 be broadly classed as either infections only or complex. All patients experience recurrent infections,  
91 particularly sinopulmonary infections, which often results in bronchiectasis[33]. Those with complex  
92 CVID develop disease-related complications, including autoimmunity, cytopenias, granulomatous  
93 disease and/or malignancy[34, 35]. The reduction but not absence in IgG and the presence of  
94 antibody-mediated autoimmune disease complications in some patients, suggest CVID as a disease of  
95 quality as well as quantity of antibody response. With the little antibody that is made possibly  
96 recognising self-antigen.

97

98 Given (1) that Fc $\gamma$ R polymorphisms have been shown to modify the risk of autoimmune diseases and  
99 (2) the incidence of autoimmune complications of CVID is about 20%, including autoantibody-  
100 mediated conditions such as ITP and autoimmune haemolytic anaemia (5-8%), we hypothesise that  
101 Fc $\gamma$ R polymorphisms may modify the disease course in CVID[36].

102 This study aims to:

- 103 1. Investigate the carriage of autoimmunity-associated Fc $\gamma$ R SNPs in a cohort of patients with  
104 PID, compared to immunocompetent controls.
- 105 2. Identify whether or not there is an association with autoimmunity-associated Fc $\gamma$ R SNPs and  
106 the development of CVID disease-related complications.

## 107 Materials and Methods

108 **Subjects:** DNA of 83 patients with PIDs was available for analysis. These patients were attending the  
109 Clinical Immunology outpatient department, John Radcliffe Hospital, Oxford, UK at the time of  
110 sampling. Whilst the primary focus of this study is CVID patients (n=56), other PID patients (n=27)  
111 were included as non-CVID controls. Many of these patients had clinically validated genetic  
112 diagnoses as well as disease-related complications such as cytopenias (**Table 1** and Supplementary  
113 Table 1). Diagnosis of CVID was made in accordance to the ESID guidelines[37], with patients being  
114 classified as infections only in the absence of any other complication. Patients were diagnosed with  
115 cytopenia if leukocytes or platelets were below the normal range for more than 6 months outside  
116 treatment for infection. The underlying causes of anaemia were further explored if unlikely to be PID-  
117 related. Pancytopenia was defined as all three lineages (erythrocytes, platelets, and leukocytes) below  
118 the normal range for  $\geq 6$  months. Other relevant clinical conditions were noted from patient notes. Our  
119 in-house control group consisted of 48 anonymous, healthy volunteers from Oxfordshire, UK. All  
120 individuals gave informed written consent. Studies were performed according to the Declaration of  
121 Helsinki with South Central Research Ethics Committee approval (12/SC/0044) for patient  
122 recruitment. Controls were recruited from the University of Oxford's Nuffield Department of  
123 Medicine through the Oxford Gastrointestinal Illness Biobank (16/YH/0247).

124 **Control cohorts:** We calculated the Hardy-Weinberg equilibrium (HWE) using a Chi Squared test for  
125 all groups compared to previously published genotype frequencies and found that the patient and  
126 control group of *FCGR2A* were not within HWE ( $p = 0.014$  and  $p = 0.003$  respectively) (**Table**  
127 **2**)[38]. To ensure a fair control group we supplemented our in-house controls with data on the same  
128 three SNPs, genotyped by the same methods, in a large previously published cohort, also shown in  
129 **Table 2**[39, 40]. All control groups were now within HWE and only the *FCGR2A* patient group was  
130 not ( $p = 0.014$ ). The power, calculated from previously published population allele frequencies,  
131 equalled 1.000 for all three receptors[38].

132 **Laboratory analysis:** gDNA samples were isolated from patient peripheral blood mononuclear cell  
133 samples using the Monarch Genomic DNA Purification Kit (New England Biolabs, UK) according to

134 manufacturer's instructions. Samples were analysed at three loci for the SNPs  
135 NM\_001136219.3(FCGR2A):c.500A>G (p.His167Arg), NM\_004001.4(FCGR2B):c.695T>C  
136 (p.Ile232Thr), and NM\_001127593.1(FCGR3A):c.526T>G (p.Phe176Val) using a previously  
137 published TaqMan method[41]. Primers, probes, and cycling conditions are shown in Supplementary  
138 Table 2. The data was analysed using the BioRad manager software.

139 **Polymerase Chain Reaction (PCR) amplification:** Samples were amplified using the Applied  
140 Biosystems 2720 Thermal Cycler (Applied Biosystems, CA, USA). Each reaction well contained:  
141 1µL gDNA 5ng/µL, 12.5µL 2X GoTaq G2 Hot Start Green Master Mix (M7422, Promega, UK), 1µL  
142 forward primer 10µM (Invitrogen, UK), 1µL reverse primer 10µM (Invitrogen, UK), 1µL de-ionised  
143 H<sub>2</sub>O. Primer design is shown in Supplementary Table 3. Touchdown PCR was used with cycling  
144 conditions shown in Supplementary Table 4. Amplification was confirmed by gel electrophoresis.

145 **Gel electrophoresis:** A 1X Tris-Acetate-EDTA buffer gel with 1% agarose was prepared with a  
146 0.01% Diamond Nucleic Acid Stain (Promega, UK). PCR samples were diluted 1 in 10 with de-  
147 ionised H<sub>2</sub>O; these were mixed with 6X DNA Loading Dye (Thermo Scientific, UK). The samples  
148 were run for 2 hours at 110V, the Quick-Load Purple 1kb Plus Ladder (New England Biolabs, UK)  
149 was used. Samples were then imaged using the ChemiDoc UV imager (Bio-Rad Laboratories, CA,  
150 USA). A single clear band at the correct number of base pairs (*FCGR2A*: 627bp, *FCGR2B*: 751bp,  
151 *FCGR3A*: 927bp) was taken as confirmation of amplification.

152 **Sanger sequencing:** Samples were purified using the Monarch PCR & DNA Cleanup Kit (5µg) (New  
153 England Biolabs, UK) according to manufacturer's instructions, using 20µL of PCR product and  
154 10µL of elution buffer. A NanoDrop 1000 (Thermo Fisher Scientific, MA, USA) full spectrum  
155 spectrophotometer was used to determine the concentration of each sample. Samples were diluted  
156 with de-ionised H<sub>2</sub>O to a concentration of 5-20ng/µL. The samples were Sanger sequenced at the  
157 MRC Weatherall Institute of Molecular Medicine (UK). Primer designs are shown in Supplementary  
158 Table 3. Analysis was performed using FinchTV. For seven samples, the Sanger sequence result  
159 differed from the TaqMan result. The TaqMan result was used for the *FCGR2A* and *FCGR2B* samples  
160 and the Sanger sequencing result in the *FCGR3A* samples per findings of Hargreaves et al.



161 demonstrating superiority of the TaqMan assays for *FCGR2A* and *FCGR2B*, and the Sanger  
162 sequencing assay for *FCGR3A*[41]. For *FCGR2B* this is due to the presence of known SNPs at the  
163 Sanger sequencing probe binding sites which have been shown to disrupt the Sanger sequencing  
164 results and report an over-representation of the *FCGR2B*-232T allele compared to previously  
165 published frequencies[10, 41, 42]. One sample for *FCGR3A* was not included in the study due to  
166 Sanger sequencing returning an inconclusive result. The decision-making process is shown in  
167 Supplementary Figure 1.

168 **Statistics:** IBM SPSS Statistics (Version 27) was used to perform Chi Squared tests; R (Version  
169 4.0.3, pwr package 1.3-0) was used to perform power calculations. Excel (Microsoft Office) was used  
170 to calculate Hardy-Weinberg equilibrium. For all tests,  $p < 0.05$  was considered significant.

## 171 Results

### 172 ***FCGR2A*-131H/H is under-represented amongst PID patients**

173 Altered genotype frequencies of *FCGR2A*-R131H have been found in different patient groups as  
174 compared to controls. Specifically, an increased prevalence of the 131H allele is associated with an  
175 increased risk of diseases, including Kawasaki disease and ITP[17, 18]. We sought to establish the  
176 allele frequency amongst patients with CVID in comparison to patients with other PIDs, in-house  
177 immunocompetent controls and a previously published cohort of immunocompetent patients  
178 undergoing cancer immunotherapy[40].

179 For *FCGR2A*-131H/R we found a significant difference between genotype distribution in patients  
180 with a PID and controls ( $p=0.019$ ), but no significant difference in allele frequencies ( $p=0.231$ )  
181 (**Table 3**). This difference was a decrease in the 131H/H genotype and a corresponding increase in the  
182 heterozygous 131H/R genotype amongst all PID patients, compared to immunocompetent controls.  
183 Subgroup analysis showed that this significant difference in genotype distribution was driven by the  
184 mixed non-CVID PID group ( $p=0.004$ ) but not the CVID cohort ( $p=0.124$ ) when compared to our  
185 control group (**Table 4**).

186 There was a statistically significant difference between the genotype distribution of the mixed non-  
187 CVID PID group and the CVID group ( $p=0.039$ ), with the 131R/R genotype making up 30.2% of  
188 CVID patients compared to just 10.7% of non-CVID PID patients (**Table 4**). There was no significant  
189 difference in allele frequencies upon any subgroup analysis (**Table 4**).

190 Further subgroup analysis of genotype and allele distribution based upon clinical phenotypes found no  
191 significant differences (**Table 5**).

### 192 **In PID patients there was no significant difference in *FCGR2B*-232I/T and *FCGR3A*-158F/V** 193 **compared to controls**

194 Altered genotype frequencies of *FCGR2B*-232I/T and *FCGR3A*-158F/V have been found in patient  
195 groups compared with controls. The low affinity 232T variant has been associated with an increased

196 risk of ITP and SLE[21-23]. Whilst the high affinity 158V variant has been shown to be associated  
197 with both childhood- and adult-onset ITP[18, 20]. We sought to establish the allele frequency  
198 amongst patients with CVID in comparison to patients with other PIDs, in-house immunocompetent  
199 controls and a previously published cohort of immunocompetent patients undergoing cancer  
200 immunotherapy[40].

201 For both *FCGR2B*-232I/T and *FCGR3A*-158F/V we found no significant difference in genotype  
202 distribution ( $p=0.260$ ,  $p=0.659$ ) or allele frequencies ( $p=0.235$ ,  $p=0.573$ ) compared to controls (**Table**  
203 **3**). Subgroup analysis breaking down the PID population into CVID, non-CVID and CMC groups  
204 also yielded no significance in either genotype distribution or allele carriage (**Table 4**) and neither did  
205 analysis based upon clinical phenotype (**Table 5**).

## 206 Discussion

207 The clinical significance of low affinity FcγR in disease has been investigated by various groups over  
208 the last 20 years[43]. Previous studies in Kawasaki disease and ITP found that the *FCGR2A*-131R/R  
209 genotype is linked with increased disease risk[17, 18]. The mechanisms behind this association have  
210 not been explored. However, due to the differing affinities between these receptors it leads to  
211 variation in the clearing of immune complexes, antigen presentation, and antibody mediated  
212 phagocytosis all of which play a role in autoimmune diseases[20]. It is possible that the greater  
213 proportion of the high affinity allele could result in an increased clearance of IgG sensitized cells.  
214 Thus, leading to an overactivation of the immune system which could cause autoimmune attacks  
215 which impair aspects of the immune system, causing a PID to develop.

216 We found no association between *FCGR2A* polymorphisms and CVID incidence rates ( $p=0.124$ ).  
217 Although our data did support an association between *FCGR2A* polymorphism and the presence of  
218 any PID compared to control ( $p=0.004$ ). This association was a decrease in the proportion of the high  
219 affinity 131H/H receptor within the patient group compared to controls. Whilst this has not been  
220 previously explored, the finding was interesting given the opposite previous findings in ITP and  
221 Kawasaki's disease[17, 18]. Due to the relatively small non-CVID cohort we were unable to further  
222 explore this association, however, this result does imply that the mechanism driving low platelet  
223 counts could differ between CVID and non-CVID ITP. Also, given the majority of non-CVID PIDs  
224 within our patient cohort had CMC (Supplementary Table 1) there is a possibility that this  
225 polymorphism is linked to inhibition of the Th17 and Th1 immune cell pathways which have  
226 previously been implicated in CMC progression[44]. To prove such a link would require further  
227 research into the area.

228 We found no significant differences between the CVID and PID cohorts and controls in both  
229 *FCGR2B* ( $p=0.260$ ) and *FCGR3A* ( $p=0.659$ ). This may be due to *FCGR2B* and *FCGR3A* not  
230 contributing to pathology in this cohort, or our it could be that our cohort is simply too small to detect  
231 an association driven by these variants.

232 We supplemented our controls with data collected from Strefford et al[40]. The patients involved in  
233 this study were being treated with either obinutuzumab- or rituximab-chemotherapy for untreated  
234 follicular lymphoma and diffuse large B-cell lymphoma in the GALLIUM and GOYA trials[45, 46].  
235 While the cohort are not healthy individuals; the median age of patients in these studies  
236 (GALLIUM=59 years, GOYA=62 years) was significantly higher than the typical age of diagnoses  
237 for CVID (20-40 years) or other PIDs (median 9.5 years)[47, 48]. It is therefore unlikely that  
238 undiagnosed PID cases could be within the reference control cohort. Fc $\gamma$ R genetics have never been  
239 demonstrated to predispose to cancer, and indeed the genotype frequencies were within expected  
240 frequencies for this cohort, suggesting there was no selection pressure as demonstrated amongst  
241 autoimmune cohorts. Furthermore, neither cancer is directly linked to the presence of a PID and  
242 therefore for our purposes these patients form a suitable control group.

243 When comparing the Sanger sequence traces to the TaqMan data there were occasional discrepancies  
244 between the two readouts. For both *FCGR2A* and *FCGR2B* we prioritised the readout from the  
245 TaqMan assays as this has been previously validated[41]. For *FCGR3A*, there is copy number  
246 variation which can complicate distinguishing FFV and FVV genotypes from FV[13]. Sanger  
247 sequencing is less affected, providing the sequence from each allele can be detected, and thus this was  
248 prioritised in cases of discrepancy[41].

#### 249 **Study limitations**

250 The small sample size was a limitation of this study, especially within the non-CVID patient cohort,  
251 as this limited the analysis which could be performed on the statistically significant difference found  
252 at the *FCGR2A* SNP. The number of different diseases present within the non-CVID patients  
253 (Supplementary Table 1) is also potentially problematic given that the different genetic make-up of  
254 each disease could affect the Fc $\gamma$ Rs differently.

255 A further limitation of the study is the discrepancies present between our TaqMan and Sanger  
256 sequencing results. We are not sure why we had a higher rate of discrepancy than researchers who  
257 have previously used the same methodology[40]. However, to mitigate the effect of these

258 discrepancies future work could involve the Sanger sequencing of a larger percentage of samples.  
259 Given that in both *FCGR2A* and *FCGR3A* it was the same patient sample which was discordant this  
260 could be due to a case of individual genetic variation, rather than a systemic issue. Finally, a repeat of  
261 the genotyping using a different set of primers could lead to a set of concordant results. For instance, a  
262 nested PCR protocol could lead to increased consistency in results due to its potential for higher  
263 sensitivity and specificity[49].

#### 264 **Further work**

265 This work could be expanded upon by increasing patient numbers, particularly the number of non-  
266 CVID patients, and exploring a wider range of PID related complications. Doing so could allow for a  
267 greater insight to the rare *FCGR2B*-232T/T genotype, as well as the rarer complications observed.  
268 However, given that PIDs are rare diseases, this would certainly require collaboration with a group(s)  
269 from a different geographical area as we were able to access samples from the majority of consenting  
270 PID patients who have lived within the John Radcliffe catchment area in the last decade.  
271 Alternatively, given the increasing number of PID patients who have undergone whole genome  
272 sequencing this could be an avenue for further analysis of the FcγR SNPs mentioned[32].

273 Further, we did not consider the remaining two low affinity FcγRs: *FCGR2C* and *FCGR3B*. Both  
274 genes contain disease-associated SNPs and copy number variations[50]. These differences have been  
275 shown in previous studies to play a role in immune diseases such as SLE and ITP and thus may  
276 potentially play a role in CVID development given their expression on natural killer cells and  
277 neutrophils, something that could be explored in future research[3, 51, 52].

#### 278 **Conclusions**

279 In summary, our results show that there is no significant genetic role of SNPs on the *FCGR2A*,  
280 *FCGR2B*, and *FCGR3A* genes in CVID. We have shown that these SNPs both do not affect the risk of  
281 developing CVID and are also not implicated in an increased risk of developing any of the most  
282 common complications. We found evidence suggesting that *FCGR2A* may play a role in the  
283 development of PIDs, but further studies of these FcγR SNPs are needed to confirm this finding.

284 Ethics Statement: Control and patient blood samples and gDNA were collected and stored with  
285 written informed consent.

286

287 Author Contributions: EWDF performed experiments, analysed data and wrote the manuscript; JEGC  
288 collected clinical information; CEH and SYP conceived and designed the study, supervised the study  
289 and wrote the manuscript. All authors critically reviewed and approved the final version of the  
290 manuscript.

291

292 Acknowledgements: The authors would like to acknowledge Alex Adams, Translational  
293 Gastroenterology Unit, Nuffield Department of Medicine for statistical advice.

294

295 Conflict of interest statement: The authors have no conflicts to declare.

## 296 References

- 297 1 Hargreaves CE, Rose-Zerilli MJ, Machado LR *et al.* *Fcγ receptors: genetic variation,*  
298 *function, and disease.* Immunological Reviews. 2015;268:6-24.
- 299 2 Ravetch JV. *Fc receptors: Rubor redux.* Cell. 1994 1994/08/26;78:553-60.
- 300 3 Vogelpoel LT, Baeten DL, de Jong EC, den Dunnen J. *Control of cytokine production by*  
301 *human fc gamma receptors: implications for pathogen defense and autoimmunity.* Front Immunol.  
302 2015;6:79.
- 303 4 Kuijpers T. *Fc-dependent mechanisms of action: roles of FcγR and FcRn.* Clin Exp Immunol.  
304 2014 Dec;178 Suppl 1:89-91.
- 305 5 Nimmerjahn F, Ravetch JV. *Fc gamma receptors as regulators of immune responses.* Nat Rev  
306 Immunol. 2008 Jan;8:34-47.
- 307 6 Koene HR, Kleijer M, Algra J, Roos D, von dem Borne AE, de Haas M. *Fc gammaRIIIa-*  
308 *158V/F polymorphism influences the binding of IgG by natural killer cell Fc gammaRIIIa,*  
309 *independently of the Fc gammaRIIIa-48L/R/H phenotype.* Blood. 1997 Aug 1;90:1109-14.
- 310 7 Warmerdam PA, van de Winkel JG, Gosselin EJ, Capel PJ. *Molecular basis for a*  
311 *polymorphism of human Fc gamma receptor II (CD32).* J Exp Med. 1990 Jul 1;172:19-25.
- 312 8 Li X, Wu J, Carter RH *et al.* *A novel polymorphism in the Fc gamma receptor IIB (CD32B)*  
313 *transmembrane region alters receptor signaling.* Arthritis Rheum. 2003 Nov;48:3242-52.
- 314 9 Parren PW, Warmerdam PA, Boeije LC *et al.* *On the interaction of IgG subclasses with the*  
315 *low affinity Fc gamma RIIa (CD32) on human monocytes, neutrophils, and platelets. Analysis of a*  
316 *functional polymorphism to human IgG2.* J Clin Invest. 1992 Oct;90:1537-46.
- 317 10 Floto RA, Clatworthy MR, Heilbronn KR *et al.* *Loss of function of a lupus-associated*  
318 *Fc gammaRIIb polymorphism through exclusion from lipid rafts.* Nat Med. 2005 Oct;11:1056-8.
- 319 11 Kono H, Kyogoku C, Suzuki T *et al.* *Fc gammaRIIb Ile232Thr transmembrane polymorphism*  
320 *associated with human systemic lupus erythematosus decreases affinity to lipid rafts and attenuates*  
321 *inhibitory effects on B cell receptor signaling.* Hum Mol Genet. 2005 Oct 1;14:2881-92.
- 322 12 Su K, Wu J, Edberg JC *et al.* *A promoter haplotype of the immunoreceptor tyrosine-based*  
323 *inhibitory motif-bearing Fc gammaRIIb alters receptor expression and associates with autoimmunity.*  
324 *I. Regulatory FCGR2B polymorphisms and their association with systemic lupus erythematosus.* J  
325 Immunol. 2004 Jun 1;172:7186-91.
- 326 13 Niederer HA, Willcocks LC, Rayner TF *et al.* *Copy number, linkage disequilibrium and*  
327 *disease association in the FCGR locus.* Hum Mol Genet. 2010 Aug 15;19:3282-94.
- 328 14 Willcocks LC, Lyons PA, Clatworthy MR *et al.* *Copy number of FCGR3B, which is*  
329 *associated with systemic lupus erythematosus, correlates with protein expression and immune*  
330 *complex uptake.* J Exp Med. 2008 Jul 7;205:1573-82.
- 331 15 Fanciulli M, Norsworthy PJ, Petretto E *et al.* *FCGR3B copy number variation is associated*  
332 *with susceptibility to systemic, but not organ-specific, autoimmunity.* Nat Genet. 2007 Jun;39:721-3.
- 333 16 Mueller M, Barros P, Witherden AS *et al.* *Genomic pathology of SLE-associated copy-*  
334 *number variation at the FCGR2C/FCGR3B/FCGR2B locus.* Am J Hum Genet. 2013 Jan 10;92:28-40.
- 335 17 Khor CC, Davila S, Breunis WB *et al.* *Genome-wide association study identifies FCGR2A as*  
336 *a susceptibility locus for Kawasaki disease.* Nat Genet. 2011 Nov 13;43:1241-6.
- 337 18 Carcao MD, Blanchette VS, Wakefield CD *et al.* *Fc gamma receptor IIa and IIIa*  
338 *polymorphisms in childhood immune thrombocytopenic purpura.* Br J Haematol. 2003 Jan;120:135-  
339 41.
- 340 19 Lee YH, Bae SC, Song GG. *FCGR2A, FCGR3A, FCGR3B polymorphisms and susceptibility*  
341 *to rheumatoid arthritis: a meta-analysis.* Clin Exp Rheumatol. 2015 Sep-Oct;33:647-54.
- 342 20 Pavkovic M, Petlichkovski A, Karanfilski O, Cevreska L, Stojanovic A. *FC gamma receptor*  
343 *polymorphisms in patients with immune thrombocytopenia.* Hematology. 2018 Apr;23:163-8.
- 344 21 Chu ZT, Tsuchiya N, Kyogoku C *et al.* *Association of Fc gamma receptor IIB polymorphism*  
345 *with susceptibility to systemic lupus erythematosus in Chinese: a common susceptibility gene in the*  
346 *Asian populations.* Tissue Antigens. 2004 Jan;63:21-7.
- 347 22 Hu W, Zhang Y, Sun X *et al.* *FcγRIIB-I232T polymorphic change allosterically suppresses*  
348 *ligand binding.* Elife. 2019 Jul 25;8.



- 349 23 Wu Z, Zhou J, Prsoon P, Wei X, Liu X, Peng B. *Low expression of FCGR1B in macrophages*  
350 *of immune thrombocytopenia-affected individuals*. Int J Hematol. 2012 Nov;96:588-93.
- 351 24 Xu L, Li G, Wang J *et al*. *Through an ITIM-independent mechanism the FcγRIIB blocks B*  
352 *cell activation by disrupting the colocalized microclustering of the B cell receptor and CD19*. J  
353 Immunol. 2014 Jun 1;192:5179-91.
- 354 25 Weisenburger T, von Neubeck B, Schneider A *et al*. *Epistatic Interactions Between Mutations*  
355 *of Deoxyribonuclease 1-Like 3 and the Inhibitory Fc Gamma Receptor IIB Result in Very Early and*  
356 *Massive Autoantibodies Against Double-Stranded DNA*. Front Immunol. 2018;9:1551.
- 357 26 Bousfiha A, Moundir A, Tangye SG *et al*. *The 2022 Update of IUIS Phenotypical*  
358 *Classification for Human Inborn Errors of Immunity*. Journal of Clinical Immunology. 2022  
359 2022/10/01;42:1508-20.
- 360 27 Conley ME, Dobbs AK, Farmer DM *et al*. *Primary B Cell Immunodeficiencies: Comparisons*  
361 *and Contrasts*. Annual Review of Immunology. 2009;27:199-227.
- 362 28 Bonilla FA, Barlan I, Chapel H *et al*. *International Consensus Document (ICON): Common*  
363 *Variable Immunodeficiency Disorders*. The Journal of Allergy and Clinical Immunology: In Practice.  
364 2016 2016/01/01;4:38-59.
- 365 29 Cunningham-Rundles C, Maglione PJ. *Common variable immunodeficiency*. J Allergy Clin  
366 Immunol. 2012 May;129:1425-6.e3.
- 367 30 de Valles-Ibáñez G, Esteve-Solé A, Piquer M *et al*. *Evaluating the Genetics of Common*  
368 *Variable Immunodeficiency: Monogenetic Model and Beyond*. Front Immunol. 2018;9:636.
- 369 31 Orange JS, Glessner JT, Resnick E *et al*. *Genome-wide association identifies diverse causes*  
370 *of common variable immunodeficiency*. J Allergy Clin Immunol. 2011 Jun;127:1360-7.e6.
- 371 32 van Schouwenburg PA, Davenport EE, Kienzler A-K *et al*. *Application of whole genome and*  
372 *RNA sequencing to investigate the genomic landscape of common variable immunodeficiency*  
373 *disorders*. Clinical Immunology. 2015 2015/10/01;160:301-14.
- 374 33 Ramzi N, Jamee M, Bakhtiyari M *et al*. *Bronchiectasis in common variable*  
375 *immunodeficiency: A systematic review and meta-analysis*. Pediatr Pulmonol. 2020 Feb;55:292-9.
- 376 34 Cunningham-Rundles C. *The many faces of common variable immunodeficiency*. Hematology  
377 Am Soc Hematol Educ Program. 2012;2012:301-5.
- 378 35 Chapel H, Lucas M, Lee M *et al*. *Common variable immunodeficiency disorders: division*  
379 *into distinct clinical phenotypes*. Blood. 2008 Jul 15;112:277-86.
- 380 36 Agarwal S, Cunningham-Rundles C. *Autoimmunity in common variable immunodeficiency*.  
381 Curr Allergy Asthma Rep. 2009 Sep;9:347-52.
- 382 37 Edgar D, Ehl S. *ESID Registry-Working definitions for clinical diagnosis of PID, 2014*.  
383 Google Scholar.1-33.
- 384 38 Nagelkerke SQ, Tacke CE, Breunis WB *et al*. *Extensive Ethnic Variation and Linkage*  
385 *Disequilibrium at the FCGR2/3 Locus: Different Genetic Associations Revealed in Kawasaki Disease*.  
386 Front Immunol. 2019;10:185-.
- 387 39 Chang C. *Statistical tests*. 2020 [cited; Available from: [https://www.cog-](https://www.cog-genomics.org/software/stats)  
388 [genomics.org/software/stats](https://www.cog-genomics.org/software/stats)]
- 389 40 Strefford JC, Nowicka M, Hargreaves CE *et al*. *Single-nucleotide Fcγ receptor*  
390 *polymorphisms do not impact obinutuzumab/rituximab outcome in patients with lymphoma*. Blood  
391 Adv. 2021 Aug 10;5:2935-44.
- 392 41 Hargreaves CE, Iriyama C, Rose-Zerilli MJ *et al*. *Evaluation of High-Throughput Genomic*  
393 *Assays for the Fc Gamma Receptor Locus*. PLoS One. 2015;10:e0142379-e.
- 394 42 Li SS, Gilbert PB, Tomaras GD *et al*. *FCGR2C polymorphisms associate with HIV-1 vaccine*  
395 *protection in RV144 trial*. J Clin Invest. 2014 Sep;124:3879-90.
- 396 43 Lehrnbecher T, Foster CB, Zhu S *et al*. *Variant genotypes of the low-affinity Fcγgamma*  
397 *receptors in two control populations and a review of low-affinity Fcγgamma receptor polymorphisms*  
398 *in control and disease populations*. Blood. 1999 Dec 15;94:4220-32.
- 399 44 Eyerich K, Eyerich S, Hiller J, Behrendt H, Traidl-Hoffmann C. *Chronic mucocutaneous*  
400 *candidiasis, from bench to bedside*. Eur J Dermatol. 2010 May-Jun;20:260-5.
- 401 45 Marcus R, Davies A, Ando K *et al*. *Obinutuzumab for the First-Line Treatment of Follicular*  
402 *Lymphoma*. N Engl J Med. 2017 Oct 5;377:1331-44.

- 403 46 Vitolo U, Trněný M, Belada D *et al.* *Obinutuzumab or Rituximab Plus Cyclophosphamide,*  
404 *Doxorubicin, Vincristine, and Prednisone in Previously Untreated Diffuse Large B-Cell Lymphoma.* *J*  
405 *Clin Oncol.* 2017 Nov 1;35:3529-37.
- 406 47 Herber M, Mertz P, Dieudonné Y *et al.* *Primary immunodeficiencies and lymphoma: a*  
407 *systematic review of literature.* *Leuk Lymphoma.* 2020 Feb;61:274-84.
- 408 48 Resnick ES, Moshier EL, Godbold JH, Cunningham-Rundles C. *Morbidity and mortality in*  
409 *common variable immune deficiency over 4 decades.* *Blood.* 2012 Feb 16;119:1650-7.
- 410 49 Green MR, Sambrook J. *Nested Polymerase Chain Reaction (PCR).* *Cold Spring Harb Protoc.*  
411 2019 Feb 1;2019.
- 412 50 Erbe AK, Wang W, Gallenberger M, Hank JA, Sondel PM. *Genotyping Single Nucleotide*  
413 *Polymorphisms and Copy Number Variability of the FCGRs Expressed on NK Cells.* *Methods Mol*  
414 *Biol.* 2016;1441:43-56.
- 415 51 Kyogoku C, Dijkstra HM, Tsuchiya N *et al.* *Fcγ receptor gene polymorphisms in*  
416 *Japanese patients with systemic lupus erythematosus: contribution of FCGR2B to genetic*  
417 *susceptibility.* *Arthritis Rheum.* 2002 May;46:1242-54.
- 418 52 Breunis WB, van Mirre E, Bruin M *et al.* *Copy number variation of the activating FCGR2C*  
419 *gene predisposes to idiopathic thrombocytopenic purpura.* *Blood.* 2008 Feb 1;111:1029-38.

420 Tables

|                                 | CVID patients (n=56) | non-CVID patients (n=27) |
|---------------------------------|----------------------|--------------------------|
| <b>Age in years (mean)</b>      | 62                   | 45                       |
| <b>Gender (female %)</b>        | 50                   | 48.1                     |
| <b>CVID type</b>                |                      |                          |
| Infections (%)†                 | 28 (56)              | -                        |
| Complex (%)†                    | 22 (44)              | -                        |
| <b>Complications</b>            |                      |                          |
| Anaemias (%)                    | 21 (37.5)            | 4 (14.8)                 |
| Organ-Specific Autoimmunity (%) | 11 (19.6)            | 2 (7.4)                  |
| Bronchiectasis (%)              | 27 (48.2)            | 8 (29.6)                 |
| Splenomegaly (%)                | 23 (41.1)            | 3 (11.1)                 |
| Granulomata (%)                 | 14 (25.0)            | 2 (7.4)                  |
| Cytopenias (%)                  | 20 (35.7)            | 5 (18.5)                 |

421 **Table 1. Clinical characteristics of cohort studied.** †Phenotypic classification for 6 CVID patients was unable to be  
422 determined.

| <b>Gene</b>                 | <b>Genotype</b> | <b>In-house Controls<br/>n (%)</b> | <b>Patients<br/>n (%)</b> | <b>Supplemented controls<br/>n (%)</b> |
|-----------------------------|-----------------|------------------------------------|---------------------------|----------------------------------------|
| <b><i>FCGR2A-131H/R</i></b> |                 |                                    |                           |                                        |
|                             | 131H/H          | 15 (31.3)                          | 15 (18.1)                 | 811 (32.3)                             |
|                             | 131H/R          | 23 (47.9)                          | 49 (59.0)                 | 1169 (46.5)                            |
|                             | 131R/R          | 10 (20.8)                          | 19 (22.9)                 | 533 (21.2)                             |
| <b>HWE Chi Squared (p)</b>  |                 | <b>8.55 (0.003)</b>                | <b>6.08 (0.014)</b>       | 0.649 (0.421)                          |
| <b><i>FCGR2B-232I/T</i></b> |                 |                                    |                           |                                        |
|                             | 232I/I          | 39 (81.25)                         | 68 (81.9)                 | 1634 (74.6)                            |
|                             | 232I/T          | 9 (18.75)                          | 13 (15.7)                 | 513 (23.4)                             |
|                             | 232T/T          | 0 (0)                              | 2 (2.4)                   | 44 (2.0)                               |
| <b>HWE Chi Squared (p)</b>  |                 | 2.51 (0.113)                       | (0.190) †                 | 0.160 (0.688)                          |
| <b><i>FCGR3A-158F/V</i></b> |                 |                                    |                           |                                        |
|                             | 158F/F          | 18 (37.5)                          | 41 (49.4)                 | 1090 (43.4)                            |
|                             | 158F/V          | 22 (45.8)                          | 32 (38.6)                 | 1119 (44.6)                            |
|                             | 158V/V          | 8 (16.7)                           | 10 (12.0)                 | 301 (12.0)                             |
| <b>HWE Chi Squared (p)</b>  |                 | 1.88 (0.170)                       | 2.256 (0.133)             | 0.371 (0.543)                          |

423 **Table 2. Genotype distributions and HWE calculations in patients with a PID, in-house control subjects, and total**  
424 **supplemented control groups. Bold italic values are statistically significant. †There were fewer than 5 individuals within a**  
425 **group so a HWE exact test was performed[39].**

| <b>Gene</b>                 | <b>Genotype</b> | <b>Patients<br/>n (%)</b> | <b>Controls<br/>n (%)</b> | <b>p-value<br/>(Chi Squared value)</b> |
|-----------------------------|-----------------|---------------------------|---------------------------|----------------------------------------|
| <b><i>FCGR2A-131H/R</i></b> |                 |                           |                           |                                        |
|                             | 131H/H          | 15 (18.1)                 | 811 (32.3)                | <b><i>.019 (7.884)</i></b>             |
|                             | 131H/R          | 49 (59.0)                 | 1169 (46.5)               |                                        |
|                             | 131R/R          | 19 (22.9)                 | 533 (21.2)                |                                        |
|                             | 131 H           | 64 (48.5)                 | 1980 (53.8)               | .231 (1.434)                           |
|                             | 131 R           | 68 (51.5)                 | 1702 (46.2)               |                                        |
| <b><i>FCGR2B-232I/T</i></b> |                 |                           |                           |                                        |
|                             | 232I/I          | 68 (81.9)                 | 1634 (74.6)               | .260 (2.696)                           |
|                             | 232I/T          | 13 (15.7)                 | 513 (23.4)                |                                        |
|                             | 232T/T          | 2 (2.4)                   | 44 (2.0)                  |                                        |
|                             | 232 I           | 81 (84.4)                 | 2147 (79.4)               | .235 (1.411)                           |
|                             | 232 T           | 15 (15.6)                 | 557 (20.6)                |                                        |
| <b><i>FCGR3A-158F/V</i></b> |                 |                           |                           |                                        |
|                             | 158F/F          | 41 (49.4)                 | 1090 (43.4)               | .659 (.833)                            |
|                             | 158F/V          | 32 (38.6)                 | 1119 (44.6)               |                                        |
|                             | 158V/V          | 10 (12.0)                 | 301 (12.0)                |                                        |
|                             | 158 F           | 73 (63.5)                 | 2209 (60.9)               | .573 (.318)                            |
|                             | 158 V           | 42 (36.5)                 | 1420 (39.1)               |                                        |

426 **Table 3. Genotype distributions and allele frequencies for patients with PIDs and controls.** Bold italic values are  
427 statistically significant.

428

| Gene                 | Groups being compared.<br>A / B | Genotype breakdown of A / B<br>n / n (%)/(%) |                          |                         | Genotype distribution<br>p-value<br>(Chi Squared value) | Allele carriage p-value<br>(Chi Squared value) |
|----------------------|---------------------------------|----------------------------------------------|--------------------------|-------------------------|---------------------------------------------------------|------------------------------------------------|
|                      |                                 |                                              |                          |                         |                                                         |                                                |
| <b>FCGR2A-131H/R</b> |                                 | <b>131R/R</b>                                | <b>131R/H</b>            | <b>131H/H</b>           |                                                         |                                                |
|                      | Control / CVID                  | 532/16<br>(21.2)/(30.2)                      | 1169/25<br>(46.5)/(47.2) | 811/12<br>(32.3)/(22.6) | .124 (4.18)                                             | .221 (1.50)                                    |
|                      | Control / non-CVID              | 532/3<br>(21.2)/(10.7)                       | 1169/22<br>(46.5)/(78.6) | 811/3<br>(32.3)/(10.7)  | <b>.004 (10.8)</b>                                      | .681 (0.169)                                   |
|                      | Control / CMC                   | 532/1<br>(21.2)/(8.3)                        | 1169/9<br>(46.5)/(75.0)  | 811/2<br>(32.3)/(16.7)  | .142 (3.911)                                            | .906 (0.014)                                   |
|                      | CVID / non-CVID                 | 16/3<br>(30.2)/(10.7)                        | 25/22<br>(47.2)/(78.6)   | 12/3<br>(22.6)/(10.7)   | <b>.039 (6.47)</b>                                      | .643 (0.214)                                   |
| <b>FCGR2B-232I/T</b> |                                 | <b>232I/I</b>                                | <b>232I/T</b>            | <b>232T/T</b>           |                                                         |                                                |
|                      | Control / CVID                  | 1634/45<br>(74.6)/(84.9)                     | 512/7<br>(23.4)/(13.2)   | 44/1<br>(2.0)/(1.9)     | .216 (3.07)                                             | .167 (1.91)                                    |
|                      | Control / non-CVID              | 1634/21<br>(74.6)/(75.0)                     | 512/6<br>(23.4)/(21.4)   | 44/1<br>(2.0)/(3.6)     | .810 (0.421)                                            | .865 (0.029)                                   |
|                      | Control / CMC                   | 1634/8<br>(74.6)/(66.7)                      | 512/3<br>(23.4)/(25.0)   | 44/1<br>(2.0)/(8.3)     | .294 (2.450)                                            | .561 (0.338)                                   |
|                      | CVID / non-CVID                 | 45/21<br>(84.9)/(75.0)                       | 7/6<br>(13.2)/(21.4)     | 1/1<br>(1.9)/(3.6)      | .641 (0.889)                                            | .425 (0.637)                                   |
| <b>FCGR3A-158F/V</b> |                                 | <b>158F/F</b>                                | <b>158F/V</b>            | <b>158V/V</b>           |                                                         |                                                |
|                      | Control / CVID                  | 1090/25<br>(43.4)/(47.2)                     | 1118/20<br>(44.6)/(37.7) | 301/8<br>(12.0)/(15.1)  | .610 (0.989)                                            | .710 (0.138)                                   |
|                      | Control / non-CVID              | 1090/15                                      | 1118/11                  | 301/2                   | .766 (0.533)                                            | .652 (0.203)                                   |

|                 |               |               |              |              |              |
|-----------------|---------------|---------------|--------------|--------------|--------------|
|                 | (43.4)/(53.6) | (44.6)/(39.3) | (12.0)/(7.1) |              |              |
| Control / CMC   | 1090/6        | 1118/6        | 301/0        | .441 (1.637) | .616 (0.252) |
|                 | (43.4)/(50.0) | (44.6)/(50.0) | (12.0)/(0.0) |              |              |
| CVID / non-CVID | 25/15         | 20/11         | 8/2          | .908 (0.193) | .891 (0.019) |
|                 | (47.2)/(53.6) | (37.7)/(39.3) | (15.1)/(7.1) |              |              |

429 **Table 4. Genotype and allele carriage statistical differences between cohort groups.** Bold italic values are statistically

430 significant.

431

| Gene                  | Complication                | Genotype and number breakdown |               |               | Genotype distribution p-value<br>(Chi-Squared value) | Allele carriage p-value<br>(Chi-Squared value) |
|-----------------------|-----------------------------|-------------------------------|---------------|---------------|------------------------------------------------------|------------------------------------------------|
|                       |                             | n (%)                         |               |               |                                                      |                                                |
| <b><i>FCGR2A-</i></b> |                             | <b>131R/R</b>                 | <b>131R/H</b> | <b>131H/H</b> |                                                      |                                                |
|                       | <b>131H/R</b>               |                               |               |               |                                                      |                                                |
|                       | Infections                  | 11 (37.9)                     | 12 (41.4)     | 6 (20.7)      |                                                      |                                                |
|                       | Complex                     | 4 (22.2)                      | 9 (50.0)      | 5 (27.8)      | .527 (1.282)                                         | .520 (0.413)                                   |
|                       | Anaemias                    | 7 (29.2)                      | 12 (50.0)     | 5 (20.8)      | .622 (0.951)                                         | .863 (0.0296)                                  |
|                       | Organ-Specific Autoimmunity | 1 (7.1)                       | 8 (57.1)      | 5 (35.7)      | .099 (4.625)                                         | .272 (1.207)                                   |
|                       | Bronchiectasis              | 10 (31.3)                     | 15 (46.9)     | 7 (21.9)      | .244 (2.825)                                         | .779 (0.079)                                   |
|                       | Splenomegaly                | 5 (21.7)                      | 13 (56.5)     | 5 (21.7)      | .890 (0.233)                                         | .825 (0.049)                                   |
|                       | Granulomata                 | 3 (21.4)                      | 9 (64.3)      | 2 (14.3)      | .857 (0.308)                                         | .686 (0.164)                                   |
|                       | Cytopenias                  | 6 (28.6)                      | 11 (52.4)     | 4 (19.0)      | .904 (0.202)                                         | .822 (0.050)                                   |
| <b><i>FCGR2B-</i></b> |                             | <b>232I/I</b>                 | <b>232I/T</b> | <b>232T/T</b> |                                                      |                                                |
|                       | <b>232I/T</b>               |                               |               |               |                                                      |                                                |
|                       | Infections                  | 25 (86.2)                     | 3 (10.3)      | 1 (3.4)       |                                                      |                                                |
|                       | Complex                     | 14 (77.8)                     | 4 (22.2)      | 0 (0)         | .413 (1.768)                                         | .564 (0.334)                                   |
|                       | Anaemias                    | 21 (87.5)                     | 3 (12.5)      | 0 (0)         | .532 (1.261)                                         | .415 (0.663)                                   |
|                       | Organ-Specific Autoimmunity | 9 (64.3)                      | 4 (28.6)      | 1 (7.1)       | .152 (3.765)                                         | .128 (2.319)                                   |
|                       | Bronchiectasis              | 26 (81.3)                     | 6 (18.8)      | 0 (0)         | .461 (1.547)                                         | .971 (0.001)                                   |
|                       | Splenomegaly                | 18 (78.3)                     | 5 (21.7)      | 0 (0)         | .477 (1.482)                                         | .743 (0.107)                                   |
|                       | Granulomata                 | 13 (92.9)                     | 1 (7.1)       | 0 (0)         | .467 (1.523)                                         | .284 (1.149)                                   |
|                       | Cytopenias                  | 16 (76.2)                     | 5 (23.8)      | 0 (0)         | .570 (1.125)                                         | .641 (0.217)                                   |
| <b><i>FCGR3A-</i></b> |                             | <b>158F/F</b>                 | <b>158F/V</b> | <b>158V/V</b> |                                                      |                                                |
|                       | <b>158F/V</b>               |                               |               |               |                                                      |                                                |
|                       | Infections                  | 17 (58.6)                     | 8 (27.6)      | 4 (13.8)      |                                                      |                                                |



|                                |           |           |          |              |              |
|--------------------------------|-----------|-----------|----------|--------------|--------------|
| Complex                        | 6 (33.3)  | 9 (50.0)  | 3 (16.7) | .217 (3.055) | .327 (0.961) |
| Anaemias                       | 11 (45.8) | 7 (29.2)  | 6 (25.0) | .072 (5.249) | .469 (0.524) |
| Organ-Specific<br>Autoimmunity | 6 (42.9)  | 7 (50.0)  | 1 (7.1)  | .570 (1.125) | .875 (0.025) |
| Bronchiectasis                 | 17 (53.1) | 10 (31.3) | 5 (15.6) | .524 (1.292) | .879 (0.023) |
| Splenomegaly                   | 10 (43.5) | 8 (34.8)  | 5 (21.7) | .269 (2.625) | .469 (0.524) |
| Granulomata                    | 4 (28.6)  | 9 (64.3)  | 1 (7.1)  | .089 (4.848) | .443 (0.589) |
| Cytopenias                     | 10 (47.6) | 6 (28.6)  | 5 (23.8) | .228 (2.960) | .564 (0.333) |

432 **Table 5. Analysis of complications development, broken down by SNP, within the PID cohort.**

## 433 Figure Legends

434 **Figure 1. TaqMan genotyping plots with gating strategy shown.** gDNA samples were genotyped  
435 in triplicate for genes *FCGR2A*, *FCGR2B*, and *FCGR3A*. The reference alleles for each gene are  
436 shown in orange circles, the alternate allele in blue squares and heterozygotes in green triangles and  
437 non-template controls as black diamonds. Gates were manually drawn to genotype samples. Samples  
438 which were not easily gated were confirmed by Sanger sequencing.

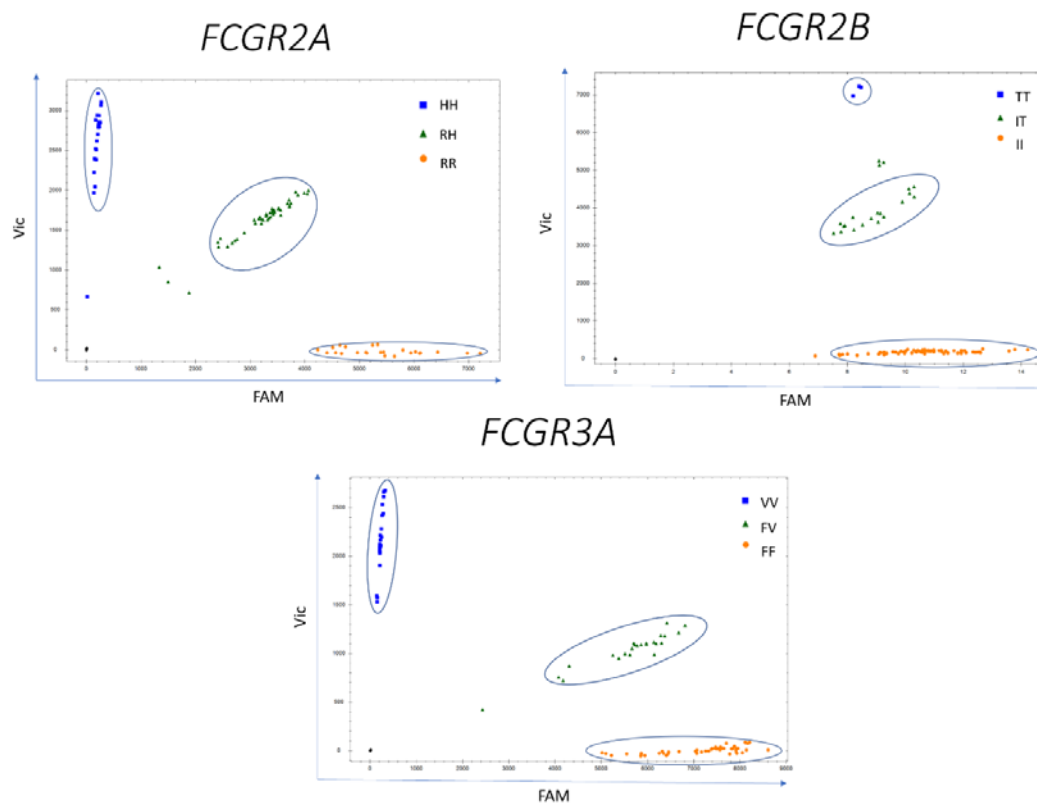

**Figure 1. TaqMan**

**n genotyping plots with gating strategy shown.** gDNA samples were genotyped in triplicate for genes *FCGR2A*, *FCGR2B* and *FCGR3A*. The reference alleles for each gene are shown in orange circles, the alternate allele in blue squares and heterozygotes in green triangles and non-template as black diamonds. Gates were manually drawn to genotype samples. Samples which were not easily gated were confirmed by Sanger sequencing.
